# Supplementary material
Source: PubMed Central journal article supplement (PMC7056433)
Supplement: tpmd190707.SD1.pdf [file tpmd190707.SD1.pdf]

**Supplemental Table S1:** Comparison of DENV results by rRT-PCR (ZCD assay) and the NS1 test.

|                                            | <b>DENV rRT-PCR</b> |                 | <b>Total</b> |
|--------------------------------------------|---------------------|-----------------|--------------|
|                                            | <b>Positive</b>     | <b>Negative</b> |              |
| <b>Antigen DENV NS1</b><br><b>Positive</b> | 34 <sup>a</sup>     | 6 <sup>b</sup>  | 40           |
| <b>Negative</b>                            | 13                  | 57 <sup>c</sup> | 70           |
| <b>Total</b>                               | 47                  | 63              | <b>110</b>   |

<sup>a</sup> 1 patient positive for anti-DENV IgM by MAC ELISA

<sup>b</sup> 4 patients positive for anti-DENV IgM by MAC ELISA,  $p < 0.001$  vs. patients positive for DENV RNA and NS1

<sup>c</sup> 3 patients positive for anti-DENV IgM by MAC ELISA
